# Supplementary material for: Challenges and translational considerations of mesenchymal stem/stromal cell therapy for Parkinson’s disease
Source: PubMed Central journal article supplement (PMC7641157; doi:10.1038/s41536-020-00106-y), 2020-11-03
Supplement: 41536_2020_106_MOESM1_ESM.pdf [file 41536_2020_106_MOESM1_ESM.pdf]

| Supplementary Table 1 Preclinical trials using naïve MSCs in PD rodent models |                  |          |              |                    |                                                                                                                                                                                   |     |
|-------------------------------------------------------------------------------|------------------|----------|--------------|--------------------|-----------------------------------------------------------------------------------------------------------------------------------------------------------------------------------|-----|
| Delivery route                                                                | PD model         | MSC type | Auto or Allo | Immunosuppression? | Brief Outcome                                                                                                                                                                     | Ref |
| Stereotactic Transplant                                                       | 6-OHDA rat model | BM MSCs  | Allo         | No                 | Behavioral improvement<br>Differentiated into dopaminergic neurons <i>in vivo</i>                                                                                                 | 109 |
|                                                                               | 6-OHDA rat model | BM MSCs  | Allo         | No                 | Behavioral improvement<br>MSCs <i>in vivo</i> differentiation status not reported                                                                                                 | 111 |
|                                                                               | 6-OHDA rat model | BM MSCs  | Allo         | Yes                | No behavioral improvement<br>MSCs <i>in vivo</i> differentiation status not reported                                                                                              | 112 |
|                                                                               | 6-OHDA rat model | BM MSCs  | Allo         | Yes                | Behavioral improvement<br>MSCs <i>in vivo</i> differentiation status not reported                                                                                                 | 113 |
|                                                                               | 6-OHDA rat model | BM MSCs  | Allo         | No                 | Behavioral improvement<br>MSCs <i>in vivo</i> differentiation status not reported                                                                                                 | 114 |
|                                                                               | 6-OHDA rat model | AD MSCs  | Allo         | No                 | No behavioral improvement<br>Working memory test improvements<br>No dopaminergic neuron differentiation detected <i>in vivo</i>                                                   | 115 |
|                                                                               | 6-OHDA rat model | AD MSCs  | Allo         | No                 | No behavioral improvement<br>Enhanced endogenous neurogenesis in subventricular zone after 3 days<br>MSCs <i>in vivo</i> differentiation status not reported                      | 117 |
|                                                                               | 6-OHDA rat model | AD MSCs  | Auto         | No                 | Behavioral improvement<br>No dopaminergic neuron differentiation detected <i>in vivo</i>                                                                                          | 116 |
|                                                                               | 6-OHDA rat model | AD MSCs  | Allo         | No                 | Behavioral improvement<br>MSCs <i>in vivo</i> differentiation status not reported                                                                                                 | 118 |
|                                                                               | 6-OHDA rat model | UC MSCs  | Allo         | No                 | Behavioral improvement<br>MSCs <i>in vivo</i> differentiation status not reported                                                                                                 | 119 |
|                                                                               | 6-OHDA rat model | UC MSCs  | Allo         | No                 | Behavioral improvement<br>Significantly increased number of dopaminergic neurons in the substantia nigra pars compacta<br>MSCs <i>in vivo</i> differentiation status not reported | 121 |
|                                                                               | MPTP rat model   | BM MSCs  | Allo         | No                 | Behavioral improvement<br>Differentiated into dopaminergic neurons <i>in vivo</i>                                                                                                 | 110 |
|                                                                               | Rotenone model   | UC MSCs  | Allo         | No                 | Behavioral improvement<br>Differentiation of MSCs to dopaminergic neurons <i>in vivo</i> after 12 months                                                                          | 120 |

| Supplementary Table 1 continued                                                                                                                                                                                                 |                  |          |              |                    |                                                                                                                                                                                                                                                                                                |     |
|---------------------------------------------------------------------------------------------------------------------------------------------------------------------------------------------------------------------------------|------------------|----------|--------------|--------------------|------------------------------------------------------------------------------------------------------------------------------------------------------------------------------------------------------------------------------------------------------------------------------------------------|-----|
| Delivery route                                                                                                                                                                                                                  | PD model         | MSC type | Auto or Allo | Immunosuppression? | Brief Outcome                                                                                                                                                                                                                                                                                  | Ref |
| Systemic Injection                                                                                                                                                                                                              | 6-OHDA rat model | BM MSCs  | Allo         | No                 | Behavioral improvement<br>MSCs <i>in vivo</i> differentiation status not reported                                                                                                                                                                                                              | 130 |
|                                                                                                                                                                                                                                 | 6-OHDA rat model | BM MSCs  | Allo         | No                 | Behavioral improvement<br>MSCs <i>in vivo</i> differentiation status not reported                                                                                                                                                                                                              | 129 |
|                                                                                                                                                                                                                                 | 6-OHDA rat model | BM MSCs  | Allo         | No                 | Behavioral improvement<br>No reduction in neurodegeneration was observed<br>MSCs <i>in vivo</i> differentiation status not reported                                                                                                                                                            | 131 |
|                                                                                                                                                                                                                                 | 6-OHDA rat model | AD MSCs  | Allo         | No                 | Behavioral improvement<br>Observed rescue of endogenous neurons from cell death<br>MSCs <i>in vivo</i> differentiation status not reported                                                                                                                                                     | 126 |
|                                                                                                                                                                                                                                 | MPTP rat model   | BM MSCs  | Allo         | No                 | Behavioral effects were not investigated<br>Significant increase in neurogenesis in the substantia nigra<br>No MSC differentiation to dopaminergic neurons <i>in vivo</i> , but the MSCs induced differentiation of neural precursor cells into dopaminergic phenotype in the substantia nigra | 128 |
|                                                                                                                                                                                                                                 | MPTP rat model   | BM MSCs  | Allo         | No                 | MSCs reduced the loss of dopaminergic neurons<br>MSCs <i>in vivo</i> differentiation status not reported                                                                                                                                                                                       | 127 |
|                                                                                                                                                                                                                                 | MPTP rat model   | BM MSCs  | Allo         | No                 | No behavioral improvement<br>MSCs were found to have reached the brain, but did not observe differentiation to dopaminergic neurons <i>in vivo</i>                                                                                                                                             | 125 |
| Intranasal Injection                                                                                                                                                                                                            | Rotenone model   | BM MSCs  | Allo         | No                 | Behavioral improvement<br>Decreased dopaminergic neuronal loss was detected<br>MSCs <i>in vivo</i> differentiation status not reported                                                                                                                                                         | 135 |
| PD Parkinson's Disease, MSCs Mesenchymal stromal/stem cells, 6-OHDA 6-hydroxydopamine, BM bone marrow, AD adipose tissue, UC umbilical cord, MPTP 1-methyl-4-phenyl-1,2,3,6-tetrahydropyridine, Auto autologous, Allo allogenic |                  |          |              |                    |                                                                                                                                                                                                                                                                                                |     |
